# Supplementary material for: An ENU mutagenesis screen identifies novel and known genes involved in epigenetic processes in the mouse
Source: PubMed Central journal article supplement (PMC4053835; doi:10.1186/gb-2013-14-9-r96), 2013-09-11
Supplement: gb-2013-14-9-r96-S2.pdf [file gb-2013-14-9-r96-S2.pdf]

**a**

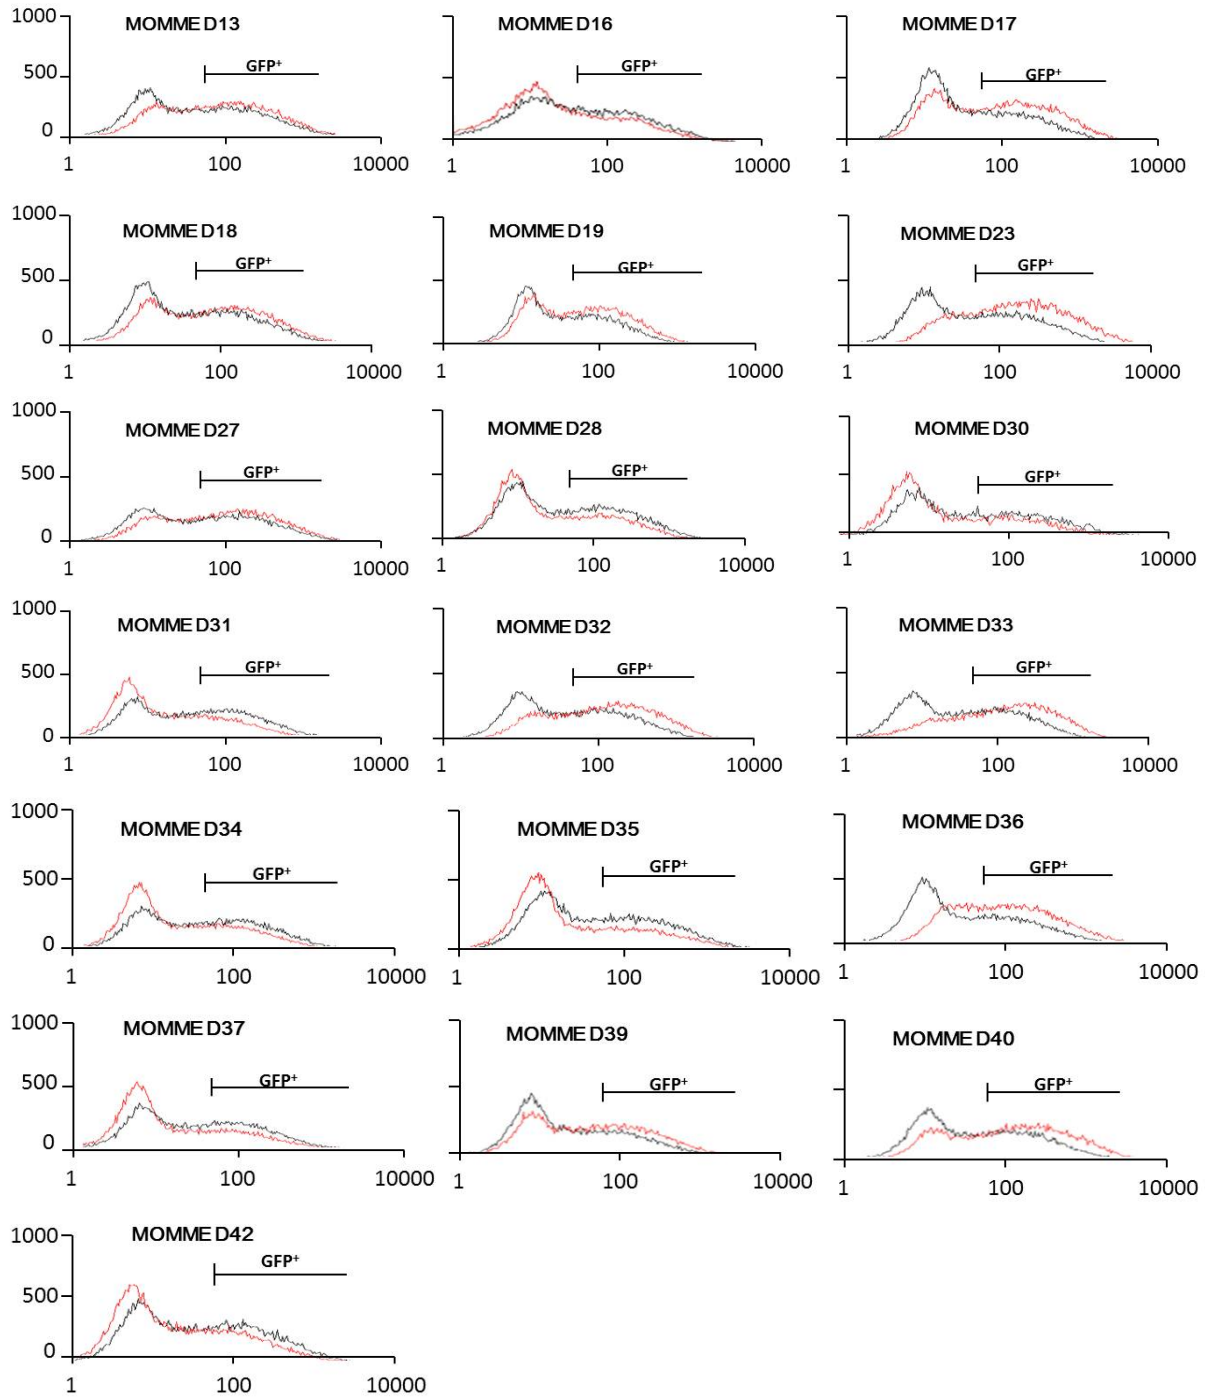

**b**

| Suppressors of Variegation - Percentage GFP Expressing Cells |                |        |                     |        |
|--------------------------------------------------------------|----------------|--------|---------------------|--------|
| Name                                                         | Gene           | +/+    | -/+                 | -/-    |
| MommeD13                                                     | <i>Setdb1</i>  | 53 ± 4 | 67 ± 3              |        |
| MommeD17                                                     | <i>Setdb1</i>  | 54 ± 4 | 65 ± 4              | 80 ± 4 |
| MommeD18                                                     | <i>Rif1</i>    | 54 ± 2 | 65 ± 2              | 83 ± 2 |
| MommeD19                                                     | <i>Smarcc1</i> | 54 ± 2 | 65 ± 5              |        |
| MommeD23                                                     | <i>Smchd1</i>  | 59 ± 2 | 88 ± 2              | 98 ± 2 |
| MommeD27                                                     | <i>Pbrm1</i>   | 60 ± 4 | 71 ± 3              |        |
| MommeD32                                                     | <i>Dnmt1</i>   | 59 ± 4 | 80 ± 3              |        |
| MommeD33                                                     | <i>Suv39h1</i> | 60 ± 2 | 71 ± 4 <sup>#</sup> |        |
| MommeD36                                                     | <i>Smchd1</i>  | 57 ± 2 | 84 ± 2              |        |
| MommeD39                                                     | <i>Smarca4</i> | 59 ± 2 | 71 ± 2              |        |
| MommeD40                                                     | <i>Uhrf1</i>   | 58 ± 3 | 75 ± 1              |        |

| Enhancers of Variegation - Percentage GFP Expressing Cells |                |        |        |        |
|------------------------------------------------------------|----------------|--------|--------|--------|
| Name                                                       | Gene           | +/+    | -/+    | -/-    |
| MommeD8                                                    | <i>Rif</i>     | 54 ± 4 | 41 ± 4 | 15 ± 4 |
| MommeD16                                                   | <i>Baz1b</i>   | 57 ± 2 | 42 ± 2 | 20 ± 4 |
| MommeD28                                                   | <i>Rif</i>     | 59 ± 3 | 44 ± 3 | 7*     |
| MommeD30                                                   | <i>Wiz</i>     | 59 ± 3 | 46 ± 3 |        |
| MommeD31                                                   | <i>Trim 28</i> | 58 ± 3 | 46 ± 2 |        |
| MommeD34                                                   | <i>Rif</i>     | 52 ± 6 | 39 ± 5 | 11 ± 2 |
| MommeD35                                                   | <i>Smarca5</i> | 58 ± 1 | 41 ± 3 |        |
| MommeD37                                                   | <i>Smarca5</i> | 54 ± 3 | 32 ± 2 |        |
| MommeD42                                                   | <i>Brd1</i>    | 56 ± 2 | 44 ± 3 |        |

\* Data from the single viable *D28/D28* mutant  
<sup>#</sup> % GFP expressing cells in hemizygous male *D33/0* mice
