# Supplementary material for: An ENU mutagenesis screen identifies novel and known genes involved in epigenetic processes in the mouse
Source: PubMed Central journal article supplement (PMC4053835; doi:10.1186/gb-2013-14-9-r96), 2013-09-11
Supplement: gb-2013-14-9-r96-S3.pdf [file gb-2013-14-9-r96-S3.pdf]

(a)

|            |         | 42 | 3 | 3 | 1 | 1 | 1 | 1 | 1 | 2 | 4 | 6 |
|------------|---------|----|---|---|---|---|---|---|---|---|---|---|
| rs33592688 | 20.5 Mb |    |   |   |   |   |   |   |   |   |   |   |
| rs33419311 | 24.9Mb  |    |   |   |   |   |   |   |   |   |   |   |
| rs29539305 | 31.0 Mb |    |   |   |   |   |   |   |   |   |   |   |
| rs33446195 | 32.9 Mb |    |   |   |   |   |   |   |   |   |   |   |
| rs3150992  | 37.5 Mb |    |   |   |   |   |   |   |   |   |   |   |
| rs29520048 | 40.9 Mb |    |   |   |   |   |   |   |   |   |   |   |
| rs6265986  | 45 Mb   |    |   |   |   |   |   |   |   |   |   |   |
| Mit20      | 57.3 Mb |    |   |   |   |   |   |   |   |   |   |   |

(b)

| Gene Start (bp)          | Associated Gene Name          | Description                                                                                                            |
|--------------------------|-------------------------------|------------------------------------------------------------------------------------------------------------------------|
| <a href="#">30761354</a> | <a href="#">Dnahc8</a>        | dynein, axonemal, heavy chain 8 Gene [Source:MGI Symbol;Acc:MGI:107714]                                                |
| <a href="#">31011751</a> | <a href="#">Gm9937</a>        | predicted gene 9937 Gene [Source:MGI Symbol;Acc:MGI:3642051]                                                           |
| <a href="#">31038812</a> | <a href="#">Glp1r</a>         | glucagon-like peptide 1 receptor Gene [Source:MGI Symbol;Acc:MGI:99571]                                                |
| <a href="#">31060691</a> | <a href="#">Gm10503</a>       | predicted gene 10503 Gene [Source:MGI Symbol;Acc:MGI:3642784]                                                          |
| <a href="#">31091624</a> | <a href="#">Umodil1</a>       | uromodulin-like 1 Gene [Source:MGI Symbol;Acc:MGI:1929785]                                                             |
| <a href="#">31194643</a> | <a href="#">Abca1</a>         | ATP-binding cassette, sub-family G (WHITE), member 1 Gene [Source:MGI (curated)]                                       |
| <a href="#">31196549</a> | <a href="#">5S_rRNA</a>       | 5S ribosomal RNA [Source:RFAM;Acc:RF00001]                                                                             |
| <a href="#">31262251</a> | <a href="#">Tff3</a>          | trefoil factor 3, intestinal Gene [Source:MGI (curated);Acc:MGI:104638]                                                |
| <a href="#">31277994</a> | <a href="#">Tff2</a>          | trefoil factor 2 (spasmodic protein 1) Gene [Source:MGI (curated);Acc:MGI:1306805]                                     |
| <a href="#">31289697</a> | <a href="#">RP23-418C19.4</a> |                                                                                                                        |
| <a href="#">31298341</a> | <a href="#">Tff1</a>          | trefoil factor 1 Gene [Source:MGI (curated);Acc:MGI:88135]                                                             |
| <a href="#">31316217</a> | <a href="#">Tmprss3</a>       | transmembrane protease, serine 3 Gene [Source:MGI (curated);Acc:MGI:2155445]                                           |
| <a href="#">31344818</a> | <a href="#">Ubash3a</a>       | ubiquitin associated and SH3 domain containing, A Gene [Source:MGI (curated);Acc:MGI:1306805]                          |
| <a href="#">31391969</a> | <a href="#">RspH1</a>         | radial spoke head 1 homolog (Chlamydomonas) Gene [Source:MGI Symbol;Acc:MGI:1306805]                                   |
| <a href="#">31433702</a> | <a href="#">Slc37a1</a>       | solute carrier family 37 (glycerol-3-phosphate transporter), member 1 Gene [Source:MGI (curated);Acc:MGI:1277179]      |
| <a href="#">31523179</a> | <a href="#">Pde9a</a>         | phosphodiesterase 9A Gene [Source:MGI (curated);Acc:MGI:1277179]                                                       |
| <a href="#">31570894</a> | <a href="#">Gm9902</a>        | predicted gene 9902 Gene [Source:MGI Symbol;Acc:MGI:3642122]                                                           |
| <a href="#">31632569</a> | <a href="#">Wdr4</a>          | WD repeat domain 4 Gene [Source:MGI Symbol;Acc:MGI:1889002]                                                            |
| <a href="#">31657120</a> | <a href="#">Ndufv3</a>        | NADH dehydrogenase (ubiquinone) flavoprotein 3 Gene [Source:MGI Symbol;Acc:MGI:1306805]                                |
| <a href="#">31694071</a> | <a href="#">RP23-106N22.1</a> |                                                                                                                        |
| <a href="#">31701746</a> | <a href="#">Pknx1</a>         | Pbx/knotted 1 homeobox Gene [Source:MGI Symbol;Acc:MGI:1201409]                                                        |
| <a href="#">31749568</a> | <a href="#">Cbs</a>           | cystathionine beta-synthase Gene [Source:MGI (curated);Acc:MGI:88285]                                                  |
| <a href="#">31784027</a> | <a href="#">U2af1</a>         | U2 small nuclear ribonucleoprotein auxiliary factor (U2AF) 1 Gene [Source:MGI Symbol;Acc:MGI:1306805]                  |
| <a href="#">31814878</a> | <a href="#">Cryaa</a>         | crystallin, alpha A Gene [Source:MGI Symbol;Acc:MGI:88515]                                                             |
| <a href="#">31981193</a> | <a href="#">Sik1</a>          | salt inducible kinase 1 Gene [Source:MGI Symbol;Acc:MGI:104754]                                                        |
| <a href="#">32081714</a> | <a href="#">Hsf2bp</a>        | heat shock transcription factor 2 binding protein Gene [Source:MGI (curated);Acc:MGI:1306805]                          |
| <a href="#">32164883</a> | <a href="#">7SK</a>           | 7SK RNA [Source:RFAM;Acc:RF00100]                                                                                      |
| <a href="#">32173045</a> | <a href="#">Rplb</a>          | ribosomal RNA processing 1 homolog B (S. cerevisiae) Gene [Source:MGI (curated);Acc:MGI:1306805]                       |
| <a href="#">32213028</a> | <a href="#">RP23-451J17.2</a> | pyridoxal (pyridoxine, vitamin B6) kinase, pseudogene (Pdxk-ps), non-coding RNA [Source:MGI (curated);Acc:MGI:1306805] |
| <a href="#">32257765</a> | <a href="#">Notch3</a>        | Notch gene homolog 3 (Drosophila) Gene [Source:MGI (curated);Acc:MGI:99460]                                            |
| <a href="#">32320715</a> | <a href="#">Eph3</a>          | epoxide hydrolase 3 Gene [Source:MGI (curated);Acc:MGI:1919182]                                                        |
| <a href="#">32333219</a> | <a href="#">Brd4</a>          | bromodomain containing 4 Gene [Source:MGI (curated);Acc:MGI:1888520]                                                   |
| <a href="#">32440621</a> | <a href="#">Akap8</a>         | A kinase (PRKA) anchor protein 8 Gene [Source:MGI Symbol;Acc:MGI:1928488]                                              |
| <a href="#">32458370</a> | <a href="#">Akap8l</a>        | A kinase (PRKA) anchor protein 8-like Gene [Source:MGI Symbol;Acc:MGI:1860606]                                         |
| <a href="#">32491011</a> | <a href="#">Wiz</a>           | widely-interspaced zinc finger motifs Gene [Source:MGI Symbol;Acc:MGI:1332638]                                         |
| <a href="#">32525956</a> | <a href="#">CT485616.1</a>    |                                                                                                                        |
| <a href="#">32527604</a> | <a href="#">Rasal3</a>        | RAS protein activator like 3 Gene [Source:MGI (curated);Acc:MGI:2444128]                                               |
| <a href="#">32539978</a> | <a href="#">A530088E08Rik</a> | RIKEN cDNA A530088E08 gene Gene [Source:MGI Symbol;Acc:MGI:3603459]                                                    |
| <a href="#">32550306</a> | <a href="#">Palvmp2</a>       | peptidoglycan recognition protein 2 Gene [Source:MGI Symbol;Acc:MGI:1928099]                                           |
| <a href="#">32589668</a> | <a href="#">Cyp4f39</a>       | cytochrome P450, family 4, subfamily f, polypeptide 39 Gene [Source:MGI Symbol;Acc:MGI:1306805]                        |
| <a href="#">32673545</a> | <a href="#">Cyp4f16</a>       | cytochrome P450, family 4, subfamily f, polypeptide 16 Gene [Source:MGI Symbol;Acc:MGI:1306805]                        |
| <a href="#">32758264</a> | <a href="#">Gm9705</a>        | predicted gene 9705 Gene [Source:MGI Symbol;Acc:MGI:3780112]                                                           |
| <a href="#">32822624</a> | <a href="#">Cyp4f15</a>       | cytochrome P450, family 4, subfamily f, polypeptide 15 Gene [Source:MGI Symbol;Acc:MGI:1306805]                        |
| <a href="#">32910210</a> | <a href="#">Zfp871</a>        | zinc finger protein 871 Gene [Source:MGI Symbol;Acc:MGI:1921793]                                                       |
| <a href="#">32933958</a> | <a href="#">Zfp811</a>        | zinc finger protein 811 Gene [Source:MGI Symbol;Acc:MGI:2682944]                                                       |
| <a href="#">32937512</a> | <a href="#">U1</a>            | U1 spliceosomal RNA [Source:RFAM;Acc:RF00003]                                                                          |
| <a href="#">32941812</a> | <a href="#">5S_rRNA</a>       | 5S ribosomal RNA [Source:RFAM;Acc:RF00001]                                                                             |
| <a href="#">32947089</a> | <a href="#">CT485613.2</a>    |                                                                                                                        |
| <a href="#">32952400</a> | <a href="#">Zfp799</a>        | zinc finger protein 799 Gene [Source:MGI Symbol;Acc:MGI:2443934]                                                       |
| <a href="#">33016173</a> | <a href="#">Zfp870</a>        | zinc finger protein 870 Gene [Source:MGI Symbol;Acc:MGI:3029586]                                                       |
