# Supplementary material for: An ENU mutagenesis screen identifies novel and known genes involved in epigenetic processes in the mouse
Source: PubMed Central journal article supplement (PMC4053835; doi:10.1186/gb-2013-14-9-r96), 2013-09-11
Supplement: gb-2013-14-9-r96-S6.pdf [file gb-2013-14-9-r96-S6.pdf]

a

***Pbrm1*<sup>MommeD27</sup> Intercross**

| Age      | +/+     | D27/+   | D27/D27  | Empty Decidua |
|----------|---------|---------|----------|---------------|
| 14.5 dpc | 11 (18) | 27 (45) | 15 (25)* | 7 (12)        |
| 3 weeks  | 19 (35) | 35 (65) | 0 (0)    | na            |

\*4 embryos were smaller than littermates, 3 of these were pale.

b

***Brd1*<sup>MommeD42</sup> Intercross**

| Age      | +/+     | D42/+   | D42/D42 |
|----------|---------|---------|---------|
| 10.5 dpc | 4 (14)  | 16 (55) | 9 (31)  |
| 14.5 dpc | 9 (50)  | 9 (50)  | 0 (0)   |
| 3 weeks  | 14 (41) | 20 (59) | 0 (0)   |

c

***Suv39h1*<sup>MommeD33</sup> Intercross**

|         | ♂       |         | ♀       |         |
|---------|---------|---------|---------|---------|
| Age     | +/0     | D33/0   | D33/+   | D33/D33 |
| 3 weeks | 34 (25) | 34 (25) | 33 (24) | 37 (26) |

d

***Uhrf1*<sup>MommeD40</sup> Intercross**

| Age             | +/+     | D40/+   | D40/D40 | Empty Decidua |
|-----------------|---------|---------|---------|---------------|
| 10.5 – 11.5 dpc | 6 (26)  | 11 (48) | 3 (13)  | 3 (13)        |
| 3 weeks         | 18 (33) | 37 (67) | 0 (0)   | na            |

e

***Baz1b*<sup>MommeD16</sup> Intercross**

| Age     | +/+     | D16/+   | D16/D16 |
|---------|---------|---------|---------|
| 3 weeks | 17 (25) | 47 (70) | 3 (4)   |

f

***Smchd1* Intercross**

| 3 weeks                                                 | +/+     | +/-     | -/-   |
|---------------------------------------------------------|---------|---------|-------|
| <i>MD23</i> <sup>-/+</sup> x <i>MD23</i> <sup>-/+</sup> | 54 (45) | 62 (52) | 4 (3) |
| <i>MD36</i> <sup>-/+</sup> x <i>MD36</i> <sup>-/+</sup> | 17 (35) | 32 (65) | 0 (0) |
| <i>MD23</i> <sup>-/+</sup> x <i>MD36</i> <sup>-/+</sup> | 13 (36) | 23 (64) | 0 (0) |

g

***Trim28*<sup>MommeD31</sup> Intercross**

| Age      | +/+    | D31/+   | D31/D31 | Empty Decidua |
|----------|--------|---------|---------|---------------|
| 10.5 dpc | 7 (29) | 12 (50) | 0 (0)   | 5 (21)        |

h

***Dnmt1*<sup>MommeD32</sup> Intercross**

| Age      | +/+     | D32/+   | D32/D32 | Empty Decidua |
|----------|---------|---------|---------|---------------|
| 10.5 dpc | 8 (22)  | 13 (36) | 4 (11)* | 11 (30)       |
| 3 weeks  | 25 (31) | 55 (69) | 0 (0)   | na            |

\*4/4 homozygous mutants were developmentally abnormal

i

***Smarca5* Intercross**

| Cross                                                 | Age           | +/+     | +/-     | -/-    | Empty Decidua |
|-------------------------------------------------------|---------------|---------|---------|--------|---------------|
| <i>D35</i> <sup>-/+</sup> x <i>D35</i> <sup>-/+</sup> | 12.5-14.5 dpc | 11 (34) | 15 (47) | 6 (19) | 0             |
| <i>D35</i> <sup>-/+</sup> x <i>D35</i> <sup>-/+</sup> | 3 weeks       | 16 (32) | 34 (68) | 0 (0)  | na            |
| <i>D37</i> <sup>-/+</sup> x <i>D37</i> <sup>-/+</sup> | 14.5 dpc      | 14 (24) | 22 (37) | 0 (0)  | 23 (39)       |
| <i>D37</i> <sup>-/+</sup> x <i>D37</i> <sup>-/+</sup> | 3 weeks       | 20 (36) | 36 (64) | 0 (0)  | na            |
