# Supplementary material for: An ENU mutagenesis screen identifies novel and known genes involved in epigenetic processes in the mouse
Source: PubMed Central journal article supplement (PMC4053835; doi:10.1186/gb-2013-14-9-r96), 2013-09-11

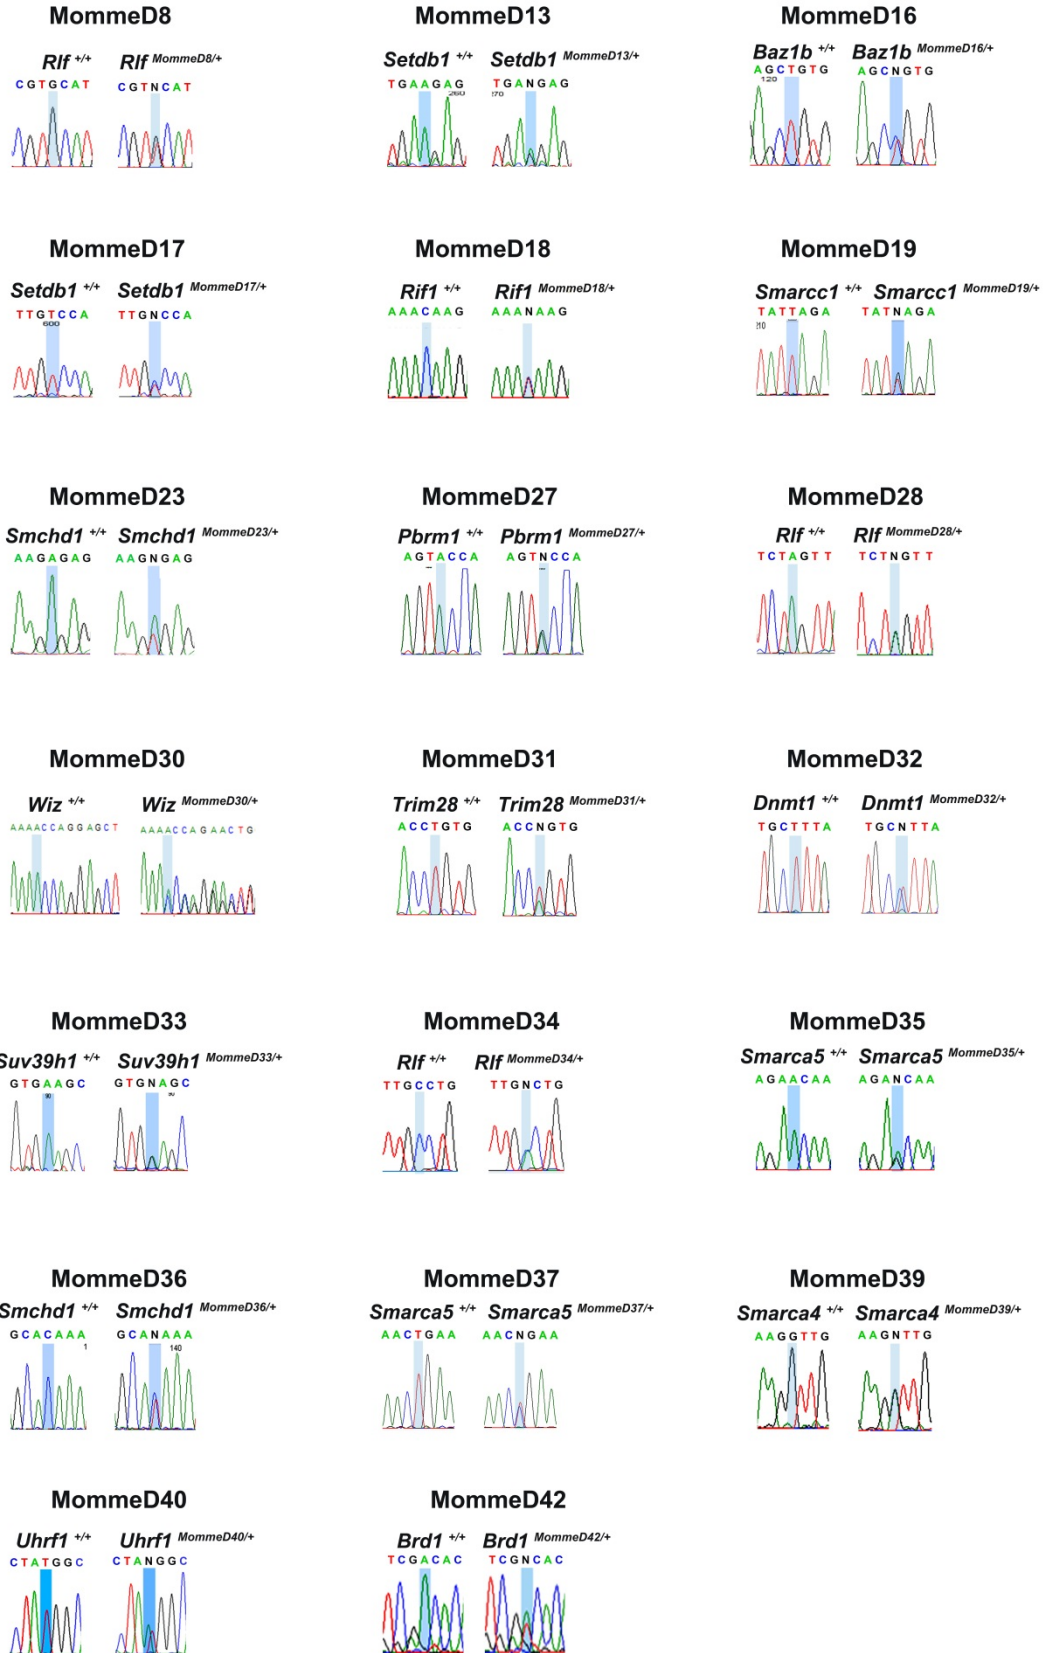

Supplement: gb-2013-14-9-r96-S9.pdf [file gb-2013-14-9-r96-S9.pdf]
